# Supplementary material for: Physico-chemical study of new supramolecular-architectured hybrid organic–inorganic sulfates incorporating diammoniumdiphenylsulfone cations
Source: Royal Society of Chemistry journal article supplement (doi:10.1039/d1ra03696c), 2021-01-01
Supplement: d1ra03696c1.pdf [file d1ra03696c1.pdf]

**ELECTRONIC SUPPORTING INFORMATION (ESI)**

**Table S1.** Crystal data and structure refinement details for **4,4'-DDS-S** and **3,3'-DDS-S**.

| <b>Compound</b>                                      | <b>4,4'-DDS-S</b>                                                               | <b>3,4'-DDS-S</b>                                                               |
|------------------------------------------------------|---------------------------------------------------------------------------------|---------------------------------------------------------------------------------|
| Empirical formula                                    | C <sub>24</sub> H <sub>28</sub> N <sub>4</sub> O <sub>12</sub> S <sub>4</sub>   | C <sub>24</sub> H <sub>28</sub> N <sub>4</sub> O <sub>12</sub> S <sub>4</sub>   |
| Formula weight                                       | 692.74                                                                          | 692.74                                                                          |
| Temperature/K                                        | 100(2)                                                                          | 100(2)                                                                          |
| Crystal system                                       | monoclinic                                                                      | monoclinic                                                                      |
| Space group                                          | <i>P</i> 2 <sub>1</sub>                                                         | <i>P</i> 2 <sub>1</sub> / <i>c</i>                                              |
| <i>a</i> /Å                                          | 10.6218(4)                                                                      | 30.1122(18)                                                                     |
| <i>b</i> /Å                                          | 9.6697(4)                                                                       | 11.7047(5)                                                                      |
| <i>c</i> /Å                                          | 14.1442(5)                                                                      | 8.0292(3)                                                                       |
| <i>α</i> /°                                          | 90                                                                              | 90                                                                              |
| <i>β</i> /°                                          | 106.322(4)                                                                      | 96.307(5)                                                                       |
| <i>γ</i> /°                                          | 90                                                                              | 90                                                                              |
| Volume/Å <sup>3</sup>                                | 1394.20(9)                                                                      | 2812.8(2)                                                                       |
| <i>Z</i>                                             | 2                                                                               | 4                                                                               |
| <i>ρ</i> <sub>calc</sub> /cm <sup>3</sup>            | 1.650                                                                           | 1.636                                                                           |
| <i>μ</i> /mm <sup>-1</sup>                           | 3.787                                                                           | 3.754                                                                           |
| <i>F</i> (000)                                       | 720.0                                                                           | 1440.0                                                                          |
| Crystal size/mm <sup>3</sup>                         | 0.29 × 0.17 × 0.11                                                              | 0.23 × 0.17 × 0.03                                                              |
| Radiation                                            | CuKα (λ = 1.54184)                                                              | CuKα (λ = 1.54184)                                                              |
| 2θ range for data collection/°                       | 6.512 to 134.11                                                                 | 5.906 to 134.154                                                                |
| Index ranges                                         | -12 ≤ <i>h</i> ≤ 12,<br>-11 ≤ <i>k</i> ≤ 11,<br>-16 ≤ <i>l</i> ≤ 16             | -35 ≤ <i>h</i> ≤ 35,<br>-13 ≤ <i>k</i> ≤ 7,<br>-9 ≤ <i>l</i> ≤ 7                |
| Reflections collected                                | 10111                                                                           | 10170                                                                           |
| Independent reflections                              | 4882 [ <i>R</i> <sub>int</sub> = 0.0250,<br><i>R</i> <sub>sigma</sub> = 0.0295] | 5010 [ <i>R</i> <sub>int</sub> = 0.0443,<br><i>R</i> <sub>sigma</sub> = 0.0629] |
| Data/restraints/parameters                           | 4882/15/433                                                                     | 5010/12/433                                                                     |
| Goodness-of-fit on <i>F</i> <sup>2</sup>             | 1.063                                                                           | 1.057                                                                           |
| Final <i>R</i> indexes [ <i>I</i> ≥ 2σ ( <i>I</i> )] | <i>R</i> <sub>1</sub> = 0.0329,<br>w <i>R</i> <sub>2</sub> = 0.0881             | <i>R</i> <sub>1</sub> = 0.0573,<br>w <i>R</i> <sub>2</sub> = 0.1344             |
| Final <i>R</i> indexes [all data]                    | <i>R</i> <sub>1</sub> = 0.0365,<br>w <i>R</i> <sub>2</sub> = 0.0919             | <i>R</i> <sub>1</sub> = 0.0832,<br>w <i>R</i> <sub>2</sub> = 0.1485             |
| Largest diff. peak/hole / e<br>Å <sup>-3</sup>       | 0.36/-0.56                                                                      | 0.54/-0.41                                                                      |
| Flack parameter                                      | -0.011(10)                                                                      | –                                                                               |

**Table S2.** Bond lengths for **4,4'-DDS-S**.

| <b>Atom</b> | <b>Atom</b> | <b>Length/Å</b> | <b>Atom</b> | <b>Atom</b> | <b>Length/Å</b> |
|-------------|-------------|-----------------|-------------|-------------|-----------------|
| C1B         | C2B         | 1.394(5)        | C3A         | C4A         | 1.382(5)        |
| C1B         | C6B         | 1.393(5)        | C4A         | C5A         | 1.389(5)        |
| C1B         | S7B         | 1.770(4)        | C4A         | N16A        | 1.459(5)        |
| C2B         | C3B         | 1.380(5)        | C5A         | C6A         | 1.387(5)        |
| C3B         | C4B         | 1.385(5)        | C8A         | C9A         | 1.392(5)        |
| C4B         | C5B         | 1.387(5)        | C8A         | C13A        | 1.395(5)        |
| C4B         | N16B        | 1.460(5)        | C8A         | S7A         | 1.777(4)        |
| C5B         | C6B         | 1.387(5)        | C9A         | C10A        | 1.389(5)        |
| C8B         | C9B         | 1.385(5)        | C10A        | C11A        | 1.384(5)        |
| C8B         | C13B        | 1.398(5)        | C11A        | C12A        | 1.386(5)        |
| C8B         | S7B         | 1.769(4)        | C11A        | N17A        | 1.459(5)        |
| C9B         | C10B        | 1.385(5)        | C12A        | C13A        | 1.385(5)        |
| C10B        | C11B        | 1.382(5)        | O14A        | S7A         | 1.439(3)        |
| C11B        | C12B        | 1.391(5)        | O15A        | S7A         | 1.443(3)        |

|      |      |          |      |      |          |
|------|------|----------|------|------|----------|
| C11B | N17B | 1.457(4) | O19B | S18B | 1.484(3) |
| C12B | C13B | 1.377(5) | O20B | S18B | 1.479(3) |
| O14B | S7B  | 1.440(3) | O21B | S18B | 1.484(3) |
| O15B | S7B  | 1.446(3) | O22B | S18B | 1.473(3) |
| C1A  | C2A  | 1.396(5) | O19A | S18A | 1.480(2) |
| C1A  | C6A  | 1.389(5) | O20A | S18A | 1.488(3) |
| C1A  | S7A  | 1.762(4) | O21A | S18A | 1.462(3) |
| C2A  | C3A  | 1.382(5) | O22A | S18A | 1.493(3) |

**Table S3.** Values of the valence angles for **4,4'-DDS-S**.

| Atom | Atom | Atom | Angle/°    | Atom | Atom | Atom | Angle/°    |
|------|------|------|------------|------|------|------|------------|
| C2B  | C1B  | S7B  | 119.1(3)   | C3A  | C4A  | N16A | 118.1(3)   |
| C6B  | C1B  | C2B  | 121.3(3)   | C5A  | C4A  | N16A | 119.8(3)   |
| C6B  | C1B  | S7B  | 119.4(3)   | C6A  | C5A  | C4A  | 119.0(3)   |
| C3B  | C2B  | C1B  | 119.1(3)   | C5A  | C6A  | C1A  | 119.1(3)   |
| C2B  | C3B  | C4B  | 119.4(3)   | C9A  | C8A  | C13A | 122.0(3)   |
| C3B  | C4B  | C5B  | 121.8(3)   | C9A  | C8A  | S7A  | 118.8(3)   |
| C3B  | C4B  | N16B | 118.3(3)   | C13A | C8A  | S7A  | 119.0(3)   |
| C5B  | C4B  | N16B | 119.8(3)   | C10A | C9A  | C8A  | 118.9(3)   |
| C4B  | C5B  | C6B  | 119.0(3)   | C11A | C10A | C9A  | 119.0(3)   |
| C5B  | C6B  | C1B  | 119.2(3)   | C10A | C11A | C12A | 122.0(3)   |
| C9B  | C8B  | C13B | 122.1(3)   | C10A | C11A | N17A | 118.8(3)   |
| C9B  | C8B  | S7B  | 118.5(3)   | C12A | C11A | N17A | 119.2(3)   |
| C13B | C8B  | S7B  | 119.2(3)   | C13A | C12A | C11A | 119.5(3)   |
| C8B  | C9B  | C10B | 118.8(3)   | C12A | C13A | C8A  | 118.4(3)   |
| C11B | C10B | C9B  | 119.2(3)   | C1A  | S7A  | C8A  | 107.84(17) |
| C10B | C11B | C12B | 121.8(3)   | O14A | S7A  | C1A  | 107.47(16) |
| C10B | C11B | N17B | 119.5(3)   | O14A | S7A  | C8A  | 107.21(16) |
| C12B | C11B | N17B | 118.6(3)   | O14A | S7A  | O15A | 119.78(16) |
| C13B | C12B | C11B | 119.3(3)   | O15A | S7A  | C1A  | 106.92(16) |
| C12B | C13B | C8B  | 118.6(3)   | O15A | S7A  | C8A  | 107.13(16) |
| C8B  | S7B  | C1B  | 107.62(18) | O20B | S18B | O19B | 108.35(15) |
| O14B | S7B  | C1B  | 107.36(16) | O20B | S18B | O21B | 109.07(15) |
| O14B | S7B  | C8B  | 107.38(16) | O21B | S18B | O19B | 109.77(15) |
| O14B | S7B  | O15B | 119.76(16) | O22B | S18B | O19B | 109.23(15) |
| O15B | S7B  | C1B  | 107.28(16) | O22B | S18B | O20B | 110.81(16) |
| O15B | S7B  | C8B  | 106.93(16) | O22B | S18B | O21B | 109.58(15) |
| C2A  | C1A  | S7A  | 119.0(3)   | O19A | S18A | O20A | 109.29(15) |
| C6A  | C1A  | C2A  | 121.5(3)   | O19A | S18A | O22A | 107.60(16) |
| C6A  | C1A  | S7A  | 119.5(3)   | O20A | S18A | O22A | 108.46(15) |
| C3A  | C2A  | C1A  | 119.1(3)   | O21A | S18A | O19A | 111.34(15) |
| C2A  | C3A  | C4A  | 119.3(3)   | O21A | S18A | O20A | 110.35(14) |
| C3A  | C4A  | C5A  | 121.9(3)   | O21A | S18A | O22A | 109.72(16) |

**Table S4.** Values of torsion angles for **4,4'-DDS-S**.

| A   | B   | C   | D    | Angle/°   | A   | B   | C   | D    | Angle/°  |
|-----|-----|-----|------|-----------|-----|-----|-----|------|----------|
| C1B | C2B | C3B | C4B  | -1.1(5)   | C1A | C2A | C3A | C4A  | -1.3(5)  |
| C2B | C1B | C6B | C5B  | -3.1(6)   | C2A | C1A | C6A | C5A  | -2.0(5)  |
| C2B | C1B | S7B | C8B  | -100.0(3) | C2A | C1A | S7A | C8A  | -92.8(3) |
| C2B | C1B | S7B | O14B | 15.3(3)   | C2A | C1A | S7A | O14A | 22.5(3)  |
| C2B | C1B | S7B | O15B | 145.3(3)  | C2A | C1A | S7A | O15A | 152.3(3) |
| C2B | C3B | C4B | C5B  | -2.2(6)   | C2A | C3A | C4A | C5A  | -0.9(6)  |
| C2B | C3B | C4B | N16B | 174.3(4)  | C2A | C3A | C4A | N16A | 174.8(3) |

|      |      |      |      |           |      |      |      |      |           |
|------|------|------|------|-----------|------|------|------|------|-----------|
| C3B  | C4B  | C5B  | C6B  | 2.9(6)    | C3A  | C4A  | C5A  | C6A  | 1.7(6)    |
| C4B  | C5B  | C6B  | C1B  | -0.2(6)   | C4A  | C5A  | C6A  | C1A  | -0.3(5)   |
| C6B  | C1B  | C2B  | C3B  | 3.8(6)    | C6A  | C1A  | C2A  | C3A  | 2.8(5)    |
| C6B  | C1B  | S7B  | C8B  | 85.1(3)   | C6A  | C1A  | S7A  | C8A  | 91.1(3)   |
| C6B  | C1B  | S7B  | O14B | -159.6(3) | C6A  | C1A  | S7A  | O14A | -153.6(3) |
| C6B  | C1B  | S7B  | O15B | -29.7(3)  | C6A  | C1A  | S7A  | O15A | -23.8(3)  |
| C8B  | C9B  | C10B | C11B | 0.1(5)    | C8A  | C9A  | C10A | C11A | 0.8(6)    |
| C9B  | C8B  | C13B | C12B | 3.0(6)    | C9A  | C8A  | C13A | C12A | 3.2(6)    |
| C9B  | C8B  | S7B  | C1B  | 95.3(3)   | C9A  | C8A  | S7A  | C1A  | 100.3(3)  |
| C9B  | C8B  | S7B  | O14B | -20.0(3)  | C9A  | C8A  | S7A  | O14A | -15.1(3)  |
| C9B  | C8B  | S7B  | O15B | -149.7(3) | C9A  | C8A  | S7A  | O15A | -144.9(3) |
| C9B  | C10B | C11B | C12B | 3.3(6)    | C9A  | C10A | C11A | C12A | 3.1(6)    |
| C9B  | C10B | C11B | N17B | -173.8(3) | C9A  | C10A | C11A | N17A | -174.5(4) |
| C10B | C11B | C12B | C13B | -3.6(6)   | C10A | C11A | C12A | C13A | -3.9(6)   |
| C11B | C12B | C13B | C8B  | 0.5(6)    | C11A | C12A | C13A | C8A  | 0.7(5)    |
| C13B | C8B  | C9B  | C10B | -3.3(6)   | C13A | C8A  | C9A  | C10A | -3.9(6)   |
| C13B | C8B  | S7B  | C1B  | -89.4(3)  | C13A | C8A  | S7A  | C1A  | -84.3(3)  |
| C13B | C8B  | S7B  | O14B | 155.3(3)  | C13A | C8A  | S7A  | O14A | 160.3(3)  |
| C13B | C8B  | S7B  | O15B | 25.6(3)   | C13A | C8A  | S7A  | O15A | 30.5(3)   |
| N16B | C4B  | C5B  | C6B  | -173.6(4) | N16A | C4A  | C5A  | C6A  | -174.0(3) |
| N17B | C11B | C12B | C13B | 173.5(3)  | N17A | C11A | C12A | C13A | 173.7(3)  |
| S7B  | C1B  | C2B  | C3B  | -171.1(3) | S7A  | C1A  | C2A  | C3A  | -173.3(3) |
| S7B  | C1B  | C6B  | C5B  | 171.7(3)  | S7A  | C1A  | C6A  | C5A  | 174.0(3)  |
| S7B  | C8B  | C9B  | C10B | 171.9(3)  | S7A  | C8A  | C9A  | C10A | 171.3(3)  |
| S7B  | C8B  | C13B | C12B | -172.2(3) | S7A  | C8A  | C13A | C12A | -172.1(3) |

**Table S5.** Bond lengths for **3,3'-DDS-S**.

| Atom | Atom | Length/Å | Atom | Atom | Length/Å |
|------|------|----------|------|------|----------|
| C1A  | C2A  | 1.376(6) | C9A  | C10A | 1.380(6) |
| C1A  | C6A  | 1.385(6) | C9B  | C10B | 1.384(5) |
| C1A  | S7A  | 1.777(4) | C10A | C11A | 1.389(6) |
| C1B  | C2B  | 1.398(6) | C10A | N17A | 1.442(6) |
| C1B  | C6B  | 1.387(6) | C10B | C11B | 1.397(6) |
| C1B  | S7B  | 1.780(4) | C10B | N17B | 1.449(5) |
| C2A  | C3A  | 1.393(6) | C11A | C12A | 1.395(6) |
| C2B  | C3B  | 1.387(6) | C11B | C12B | 1.375(6) |
| C3A  | C4A  | 1.385(6) | C12A | C13A | 1.389(6) |
| C3A  | N16A | 1.447(5) | C12B | C13B | 1.394(6) |
| C3B  | C4B  | 1.389(6) | O14A | S7A  | 1.442(3) |
| C3B  | N16B | 1.464(6) | O14B | S7B  | 1.438(3) |
| C4A  | C5A  | 1.379(6) | O15A | S7A  | 1.435(3) |
| C4B  | C5B  | 1.398(6) | O15B | S7B  | 1.433(3) |
| C5A  | C6A  | 1.401(6) | O19B | S18B | 1.480(3) |
| C5B  | C6B  | 1.390(6) | O20B | S18B | 1.494(3) |
| C8A  | C9A  | 1.394(6) | O21B | S18B | 1.494(3) |
| C8A  | C13A | 1.385(6) | O22B | S18B | 1.454(3) |
| C8A  | S7A  | 1.781(4) | O19A | S18A | 1.493(3) |
| C8B  | C9B  | 1.388(6) | O20A | S18A | 1.451(3) |
| C8B  | C13B | 1.392(6) | O21A | S18A | 1.477(3) |
| C8B  | S7B  | 1.777(4) | O22A | S18A | 1.501(3) |

**Table S6.** Values of valence angles for **3,3'-DDS-S**.

| Atom | Atom | Atom | Angle/° | Atom | Atom | Atom | Angle/° |
|------|------|------|---------|------|------|------|---------|
|------|------|------|---------|------|------|------|---------|

|      |      |      |          |      |      |      |            |
|------|------|------|----------|------|------|------|------------|
| C2A  | C1A  | C6A  | 122.0(4) | C9B  | C10B | N17B | 119.4(4)   |
| C2A  | C1A  | S7A  | 118.4(3) | C11B | C10B | N17B | 119.7(4)   |
| C6A  | C1A  | S7A  | 119.3(3) | C10A | C11A | C12A | 119.6(4)   |
| C2B  | C1B  | S7B  | 117.4(3) | C12B | C11B | C10B | 119.5(4)   |
| C6B  | C1B  | C2B  | 121.8(4) | C13A | C12A | C11A | 120.3(4)   |
| C6B  | C1B  | S7B  | 120.6(3) | C11B | C12B | C13B | 120.8(4)   |
| C1A  | C2A  | C3A  | 118.8(4) | C8A  | C13A | C12A | 118.8(4)   |
| C3B  | C2B  | C1B  | 118.6(4) | C8B  | C13B | C12B | 118.7(4)   |
| C2A  | C3A  | N16A | 118.1(4) | C1A  | S7A  | C8A  | 100.28(19) |
| C4A  | C3A  | C2A  | 120.5(4) | O14A | S7A  | C1A  | 108.28(19) |
| C4A  | C3A  | N16A | 121.4(4) | O14A | S7A  | C8A  | 108.04(19) |
| C2B  | C3B  | C4B  | 120.7(4) | O15A | S7A  | C1A  | 108.04(19) |
| C2B  | C3B  | N16B | 117.9(4) | O15A | S7A  | C8A  | 109.7(2)   |
| C4B  | C3B  | N16B | 121.3(4) | O15A | S7A  | O14A | 120.56(18) |
| C5A  | C4A  | C3A  | 119.8(4) | C8B  | S7B  | C1B  | 103.20(19) |
| C3B  | C4B  | C5B  | 119.8(4) | O14B | S7B  | C1B  | 106.96(19) |
| C4A  | C5A  | C6A  | 120.6(4) | O14B | S7B  | C8B  | 108.00(18) |
| C6B  | C5B  | C4B  | 120.5(4) | O15B | S7B  | C1B  | 109.3(2)   |
| C1A  | C6A  | C5A  | 118.2(4) | O15B | S7B  | C8B  | 107.84(18) |
| C1B  | C6B  | C5B  | 118.7(4) | O15B | S7B  | O14B | 120.20(18) |
| C9A  | C8A  | S7A  | 116.4(3) | O19B | S18B | O20B | 108.44(19) |
| C13A | C8A  | C9A  | 121.7(4) | O19B | S18B | O21B | 108.40(17) |
| C13A | C8A  | S7A  | 121.4(3) | O20B | S18B | O21B | 107.10(17) |
| C9B  | C8B  | C13B | 121.4(4) | O22B | S18B | O19B | 111.45(18) |
| C9B  | C8B  | S7B  | 118.6(3) | O22B | S18B | O20B | 110.98(19) |
| C13B | C8B  | S7B  | 119.9(3) | O22B | S18B | O21B | 110.32(18) |
| C10A | C9A  | C8A  | 118.5(4) | O19A | S18A | O22A | 106.30(18) |
| C10B | C9B  | C8B  | 118.7(4) | O20A | S18A | O19A | 110.00(17) |
| C9A  | C10A | C11A | 120.9(4) | O20A | S18A | O21A | 112.32(18) |
| C9A  | C10A | N17A | 118.1(4) | O20A | S18A | O22A | 110.85(18) |
| C11A | C10A | N17A | 120.8(4) | O21A | S18A | O19A | 108.45(17) |
| C9B  | C10B | C11B | 120.9(4) | O21A | S18A | O22A | 108.70(17) |

**Table S7.** Values of torsion angles for **3,3'-DDS-S**.

| A   | B   | C   | D    | Angle/°   | A    | B    | C    | D    | Angle/°   |
|-----|-----|-----|------|-----------|------|------|------|------|-----------|
| C1A | C2A | C3A | C4A  | 1.6(6)    | C9A  | C8A  | S7A  | O14A | -38.6(4)  |
| C1A | C2A | C3A | N16A | -176.3(4) | C9A  | C8A  | S7A  | O15A | -171.9(3) |
| C1B | C2B | C3B | C4B  | -1.9(6)   | C9A  | C10A | C11A | C12A | 0.2(7)    |
| C1B | C2B | C3B | N16B | 174.1(3)  | C9B  | C8B  | C13B | C12B | -0.3(6)   |
| C2A | C1A | C6A | C5A  | 1.1(6)    | C9B  | C8B  | S7B  | C1B  | -62.4(4)  |
| C2A | C1A | S7A | C8A  | -66.9(4)  | C9B  | C8B  | S7B  | O14B | 50.6(4)   |
| C2A | C1A | S7A | O14A | 46.2(4)   | C9B  | C8B  | S7B  | O15B | -178.1(3) |
| C2A | C1A | S7A | O15A | 178.3(3)  | C9B  | C10B | C11B | C12B | 0.9(6)    |
| C2A | C3A | C4A | C5A  | 1.1(6)    | C10A | C11A | C12A | C13A | 1.9(7)    |
| C2B | C1B | C6B | C5B  | 0.7(6)    | C10B | C11B | C12B | C13B | -1.3(6)   |
| C2B | C1B | S7B | C8B  | 81.5(3)   | C11A | C12A | C13A | C8A  | -1.5(7)   |
| C2B | C1B | S7B | O14B | -32.3(4)  | C11B | C12B | C13B | C8B  | 1.0(6)    |
| C2B | C1B | S7B | O15B | -163.9(3) | C13A | C8A  | C9A  | C10A | 3.2(6)    |
| C2B | C3B | C4B | C5B  | 0.9(6)    | C13A | C8A  | S7A  | C1A  | -97.8(4)  |
| C3A | C4A | C5A | C6A  | -2.7(6)   | C13A | C8A  | S7A  | O14A | 149.0(3)  |
| C3B | C4B | C5B | C6B  | 1.0(7)    | C13A | C8A  | S7A  | O15A | 15.8(4)   |
| C4A | C5A | C6A | C1A  | 1.7(6)    | C13B | C8B  | C9B  | C10B | -0.1(6)   |
| C4B | C5B | C6B | C1B  | -1.8(7)   | C13B | C8B  | S7B  | C1B  | 115.4(4)  |

|     |     |      |      |           |      |      |      |      |           |
|-----|-----|------|------|-----------|------|------|------|------|-----------|
| C6A | C1A | C2A  | C3A  | -2.7(6)   | C13B | C8B  | S7B  | O14B | -131.5(3) |
| C6A | C1A | S7A  | C8A  | 107.2(4)  | C13B | C8B  | S7B  | O15B | -0.2(4)   |
| C6A | C1A | S7A  | O14A | -139.8(3) | N16A | C3A  | C4A  | C5A  | 178.9(4)  |
| C6A | C1A | S7A  | O15A | -7.6(4)   | N16B | C3B  | C4B  | C5B  | -175.0(4) |
| C6B | C1B | C2B  | C3B  | 1.1(6)    | N17A | C10A | C11A | C12A | -174.5(4) |
| C6B | C1B | S7B  | C8B  | -93.5(4)  | N17B | C10B | C11B | C12B | 178.5(4)  |
| C6B | C1B | S7B  | O14B | 152.7(3)  | S7A  | C1A  | C2A  | C3A  | 171.2(3)  |
| C6B | C1B | S7B  | O15B | 21.1(4)   | S7A  | C1A  | C6A  | C5A  | -172.8(3) |
| C8A | C9A | C10A | C11A | -2.7(6)   | S7A  | C8A  | C9A  | C10A | -169.1(3) |
| C8A | C9A | C10A | N17A | 172.1(4)  | S7A  | C8A  | C13A | C12A | 170.8(3)  |
| C8B | C9B | C10B | C11B | -0.2(6)   | S7B  | C1B  | C2B  | C3B  | -173.9(3) |
| C8B | C9B | C10B | N17B | -177.8(4) | S7B  | C1B  | C6B  | C5B  | 175.5(3)  |
| C9A | C8A | C13A | C12A | -1.2(6)   | S7B  | C8B  | C9B  | C10B | 177.8(3)  |
| C9A | C8A | S7A  | C1A  | 74.6(3)   | S7B  | C8B  | C13B | C12B | -178.2(3) |

**Table S8.** Values of geometrical parameters of the hydrogen bonds identified in the crystal of **4,4'-SDD-S**.

| D–H       | A                    | d(D–H) [Å] | d(H···A) [Å] | d(D···A) [Å] | <(D–H···A) [°] |
|-----------|----------------------|------------|--------------|--------------|----------------|
| N16B–H16A | O19B                 | 0.88(4)    | 1.88(4)      | 2.733(4)     | 163(4)         |
| N16B–H16B | O19A                 | 0.87(2)    | 2.54(2)      | 3.362(5)     | 158(3)         |
| N16B–H16B | O22A                 | 0.87(2)    | 2.19(4)      | 2.921(4)     | 142(3)         |
| N16B–H16C | O20B <sup>i</sup>    | 0.87(3)    | 1.84(3)      | 2.683(5)     | 163(4)         |
| N16A–H16D | O22A <sup>ii</sup>   | 0.87(4)    | 1.92(3)      | 2.740(4)     | 156(4)         |
| N16A–H16E | O21B <sup>iii</sup>  | 0.87(3)    | 1.94(3)      | 2.805(4)     | 169(4)         |
| N16A–H16F | O19A                 | 0.87(4)    | 1.90(4)      | 2.748(4)     | 165(4)         |
| N17B–H17A | O20B <sup>iv</sup>   | 0.88(3)    | 2.46(3)      | 3.042(4)     | 124(3)         |
| N17B–H17A | O21B <sup>iv</sup>   | 0.88(3)    | 2.05(3)      | 2.871(4)     | 155(4)         |
| N17B–H17B | O20A <sup>v</sup>    | 0.88(3)    | 1.95(3)      | 2.812(4)     | 166(3)         |
| N17B–H17C | O19B <sup>vi</sup>   | 0.88(4)    | 2.47(4)      | 3.088(4)     | 128(3)         |
| N17B–H17C | O22B <sup>vi</sup>   | 0.88(4)    | 1.94(4)      | 2.775(4)     | 159(4)         |
| N17A–H17D | O19A <sup>vii</sup>  | 0.88(4)    | 2.55(4)      | 3.209(5)     | 133(3)         |
| N17A–H17D | O20A <sup>vii</sup>  | 0.88(4)    | 1.98(4)      | 2.809(4)     | 156(4)         |
| N17A–H17E | O19B <sup>iv</sup>   | 0.88(2)    | 1.91(3)      | 2.732(4)     | 155(3)         |
| N17A–H17F | O22A <sup>iv</sup>   | 0.87(2)    | 1.97(3)      | 2.766(5)     | 153(4)         |
| C2A–H2A   | O15B                 | 0.93       | 2.50         | 3.343(5)     | 152            |
| C5A–H5A   | O22B <sup>iii</sup>  | 0.93       | 2.58         | 3.213(5)     | 126            |
| C5B–H5B   | O19A                 | 0.93       | 2.49         | 3.309(5)     | 147            |
| C6B–H6B   | O15A <sup>viii</sup> | 0.93       | 2.50         | 3.388(5)     | 161            |
| C10A–H10A | O20B <sup>iv</sup>   | 0.93       | 2.58         | 3.501(5)     | 169            |
| C10B–H10B | O21A <sup>v</sup>    | 0.93       | 2.57         | 3.175(5)     | 123            |

Symmetry codes: (i)  $-x + 1, y - 1/2, -z + 1$ ; (ii)  $-x, y + 1/2, -z + 1$ ; (iii)  $x - 1, y, z$ ; (iv)  $x, y, z + 1$ ; (v)  $x + 1, y, z + 1$ ; (vi)  $-x + 1, y - 1/2, -z + 2$ ; (vii)  $-x, y + 1/2, -z + 2$ ; (viii)  $-x, y - 1/2, -z + 2$ .

**Table S9.** Values of geometrical parameters of the S–O··· $\pi$  contacts in the crystal of **4,4'-SDD-S**.

| D–X      | CgI              | d(X···CgI) [Å] | <(D–X···CgI) [°] | d(D···CgI) [Å] |
|----------|------------------|----------------|------------------|----------------|
| S7A–O14A | 1 <sup>vii</sup> | 3.651(3)       | 89.44(11)        | 3.9116(18)     |
| S7B–O14B | 3 <sup>ix</sup>  | 3.811(3)       | 92.44(12)        | 4.1306(18)     |
| S7B–O14B | 4 <sup>ix</sup>  | 3.690(3)       | 91.59(12)        | 3.9983(18)     |
| S7A–O15A | 1 <sup>vii</sup> | 3.515(3)       | 94.86(12)        | 3.9116(18)     |
| S7A–O15A | 2 <sup>vii</sup> | 3.861(3)       | 93.72(11)        | 4.2085(18)     |
| S7B–O15B | 3 <sup>ix</sup>  | 3.818(3)       | 92.05(13)        | 4.1306(18)     |
| S7B–O15B | 4 <sup>ix</sup>  | 3.700(3)       | 91.12(13)        | 3.9983(18)     |

Cg1, Cg2, Cg3 and Cg4 denote the geometric centers of gravity of aromatic rings defined by the C1A–C6A, C8A–C13A, C1B–C6B and C8B–C13B atoms, respectively.

Symmetry codes: (vii)  $-x, y + 1/2, -z + 2$ ; (ix)  $-x + 1, y + 1/2, -z + 2$ .

**Table S10.** Values of geometrical parameters of the hydrogen bonds identified in the crystal of **3,3'-SDD-S**.

| D–H | A | d(D–H) [Å] | d(H···A) [Å] | d(D···A) [Å] | <(D–H···A) [°] |
|-----|---|------------|--------------|--------------|----------------|
|-----|---|------------|--------------|--------------|----------------|

|           |                     |         |         |          |           |
|-----------|---------------------|---------|---------|----------|-----------|
| N16A–H16A | O19B                | 0.87(3) | 2.24(5) | 2.828(5) | 125(3)    |
| N16A–H16A | O20B                | 0.87(3) | 2.31(3) | 3.165(5) | 170(5)    |
| N16A–H16B | O19A <sup>i</sup>   | 0.87(2) | 1.86(3) | 2.723(4) | 169(5)    |
| N16A–H16C | O19A                | 0.88(4) | 1.85(4) | 2.725(5) | 177(3)    |
| N16B–H16D | O19A                | 0.87(3) | 2.36(5) | 3.034(5) | 135(4)    |
| N16B–H16D | O22A                | 0.87(3) | 2.35(3) | 3.141(5) | 151(4)    |
| N16B–H16E | O22A <sup>ii</sup>  | 0.88(3) | 1.95(3) | 2.795(5) | 163(4)    |
| N16B–H16F | O19B                | 0.87(4) | 1.84(4) | 2.687(5) | 163(4)    |
| N17A–H17A | O20B <sup>iii</sup> | 0.87(3) | 1.98(4) | 2.828(5) | 163(4)    |
| N17A–H17A | O21B <sup>iii</sup> | 0.87(3) | 2.51(5) | 3.054(5) | 121(4)    |
| N17A–H17B | O20B                | 0.87(3) | 2.02(3) | 2.829(5) | 153(4)    |
| N17A–H17C | O21A <sup>ii</sup>  | 0.87(4) | 1.86(4) | 2.731(5) | 177(4)    |
| N17B–H17D | O21A <sup>i</sup>   | 0.87(3) | 2.46(5) | 2.983(5) | 119(4)    |
| N17B–H17D | O22A <sup>i</sup>   | 0.87(3) | 1.96(3) | 2.828(5) | 175.6(19) |
| N17B–H17E | O21B <sup>iv</sup>  | 0.87(4) | 1.91(4) | 2.761(4) | 166(4)    |
| N17B–H17F | O21B                | 0.87(3) | 1.92(3) | 2.782(4) | 170(4)    |
| C2A–H2A   | O20A <sup>ii</sup>  | 0.93    | 2.50    | 3.357(5) | 154       |
| C4B–H4B   | O22A                | 0.93    | 2.59    | 3.209(6) | 124       |
| C5A–H5A   | O14A <sup>v</sup>   | 0.93    | 2.38    | 3.088(5) | 133       |
| C9B–H9B   | O21B                | 0.93    | 2.50    | 3.178(5) | 130       |
| C12A–H12A | O15A <sup>vi</sup>  | 0.93    | 2.58    | 3.420(6) | 150       |
| C12B–H12B | O14B <sup>v</sup>   | 0.93    | 2.48    | 3.149(5) | 129       |

Symmetry codes: (i)  $x, -y + 1/2, z + 1/2$ ; (ii)  $x, -y + 1/2, z - 1/2$ ; (iii)  $x, -y + 3/2, z - 1/2$ ; (iv)  $x, -y + 3/2, z + 1/2$ ; (v)  $x, y, z + 1$ ; (vi)  $x - 1, y + 1/2, -z + 1/2$ .

**Table S11.** Values of geometrical parameters of the S–O··· $\pi$  contacts in the crystal of **3,3'-SDD-S**.

| D–X      | CgI              | d(X···CgI) [Å] | <(D–X···CgI) [°] | d(D···CgI) [Å] |
|----------|------------------|----------------|------------------|----------------|
| S7A–O14A | 1 <sup>ii</sup>  | 3.195(4)       | 136.51(16)       | 4.3562(19)     |
| S7B–O14B | 4 <sup>iii</sup> | 3.143(3)       | 141.31(14)       | 4.3593(19)     |

Cg1 and Cg4 denote the geometric centers of gravity of aromatic rings defined by the C1A–C6A and C8B–C13B atoms, respectively. Symmetry codes: (ii)  $x, -y + 1/2, z - 1/2$ ; (iii)  $x, -y + 3/2, z - 1/2$ .

**Table S12.** Attribution of the IR and Raman frequencies of the different functional groups for investigated compounds.

| 4,4'-DDS-S             |                           | 3,3'-DDS-S             |  | Attribution                                                     |
|------------------------|---------------------------|------------------------|--|-----------------------------------------------------------------|
| IR (cm <sup>-1</sup> ) | Raman (cm <sup>-1</sup> ) | IR (cm <sup>-1</sup> ) |  |                                                                 |
| 3470                   | -                         | 3563                   |  | $\nu$ (CH)                                                      |
| 3070                   | -                         | 3056                   |  | $\nu$ (CH)                                                      |
| 2862                   | -                         | 2865                   |  | $\nu$ (CH)                                                      |
| 2604                   | -                         | 2597                   |  | $\nu$ (N–H.. O)                                                 |
| 2137                   | -                         | 2134                   |  | $\nu$ (N–H.. O)                                                 |
| 1936                   | -                         | 1934                   |  | $\nu$ (N–H.. O)                                                 |
| 1626                   | -                         | 1623                   |  | $\delta_{as}$ (NH <sub>3</sub> )                                |
| 1602                   | 1603                      | 1597                   |  | $\delta_{as}$ (NH <sub>3</sub> )                                |
| 1579                   | -                         | 1564                   |  | $\delta_s$ (NH <sub>3</sub> )                                   |
| 1497                   | 1501                      | 1501                   |  | $\nu$ (C=C)                                                     |
| 1482                   | -                         | 1498                   |  | $\nu$ (C=C)                                                     |
| 1425                   | -                         | 1444                   |  | $\delta$ (C–C–H)                                                |
| 1310                   | -                         | 1318                   |  | $\nu$ (C–S)                                                     |
| 1297                   | 1220                      | 1219                   |  | $\nu_{as}$ (SO <sub>2</sub> ), $\nu$ (C–C)                      |
| 1234                   | 1193                      | 1206                   |  | $\nu$ (C–C), $\nu$ (C–N)                                        |
| 1134                   | 1153                      | 1151                   |  | $\nu_s$ (S=O), $\nu$ (C–N), $\delta$ (CH)                       |
| 1092                   | -                         | 1091                   |  | $\delta$ (C–C–H)                                                |
| 1072                   | 1072                      | 1077                   |  | $\nu_3$ (SO <sub>4</sub> )                                      |
| 1057,1036              | -                         | 1040                   |  | $\nu$ (C–N)                                                     |
| 1000                   | -                         | 1002                   |  | $\nu$ (C–C), $\delta$ (H–N–C)                                   |
| -                      | 974                       | 970                    |  | $\delta_{as}$ (C–C–C) <sub>Ar</sub>                             |
| 963                    | 963                       | 965                    |  | $\nu_1$ (SO <sub>4</sub> ), $\delta_{as}$ (C–C–C) <sub>Ar</sub> |
| 827                    | 829-810                   | 820                    |  | $\nu$ (CH)                                                      |
| 708                    | -                         | 697                    |  | $\nu$ (C–S)                                                     |

|         |         |     |                                                        |
|---------|---------|-----|--------------------------------------------------------|
| 684     | -       | 678 | $\nu(\text{C-S}), \delta(\text{O-S-C})$                |
| 632     | 633     | 637 | $\nu(\text{C-S}), \delta(\text{C-C-C})_{\text{Ar}}$    |
| 616-550 | 613     | 618 | $\nu_4(\text{SO}_4), \delta(\text{C-C-C})_{\text{Ar}}$ |
| 490     | 493     | 485 | $\nu_s(\text{SO}_2), \delta(\text{C-N})$               |
| 455     | 455     | 458 | $\nu_2(\text{SO}_4), \delta(\text{C-C-C})_{\text{Ar}}$ |
| -       | 293     |     | $\nu(\text{SO}_2)$                                     |
| -       | 288-201 |     | Network translation                                    |
| -       | 193-118 |     | Network translation                                    |

**Table S13.** Attribution of the chemical shifting for the 4,4'-DDS-S.

| $\delta$ (ppm) | C-atoms            |
|----------------|--------------------|
| 124,30         | <b>C of type 1</b> |
| 126,32         |                    |
| 131,29         | <b>C of type 2</b> |
| 132,55         |                    |
| 137,14         | <b>C of type 3</b> |
| 140,35         |                    |
| 141,58         |                    |
| 152,33         | <b>C of type 4</b> |

C5A, C3A, C10A, C12A,  
C5B, C3B, C10B, C12B

C6A, C2A, C9A, C13A,  
C6B, C2B, C9B, C13B

C1A, C8A, C9B, C8B

C4A, C11A, C4B, C11B

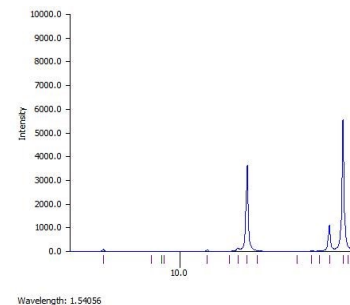

**Figure S1.** Simulated PXRD pattern for 4,4'-DDS-S.

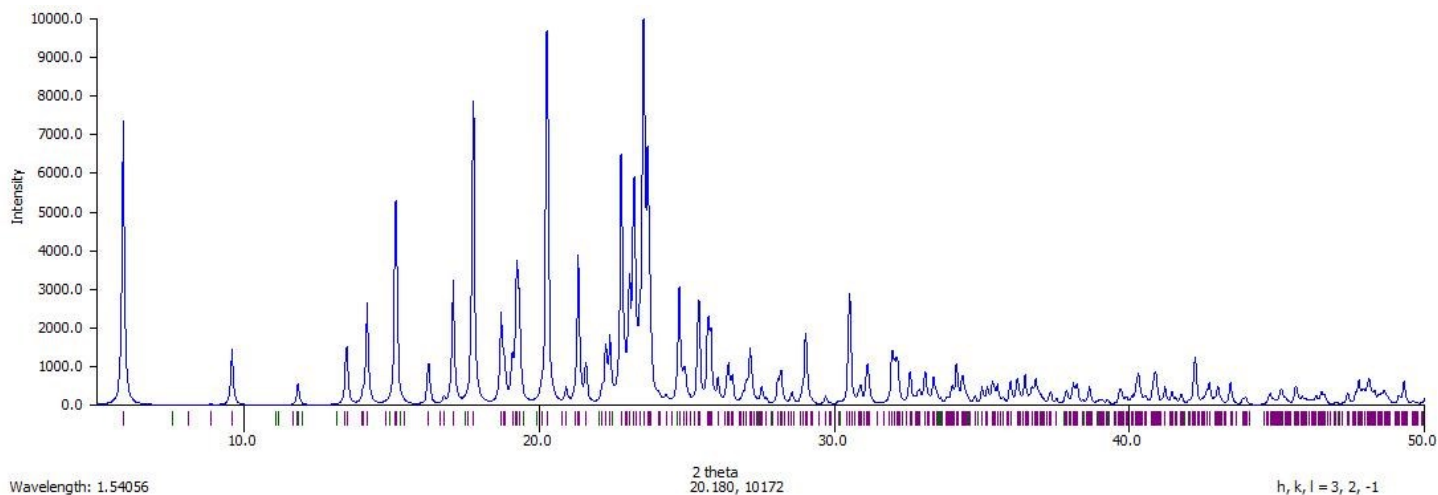

**Figure S2.** Simulated PXRD pattern for 3,3'-DDS-S.

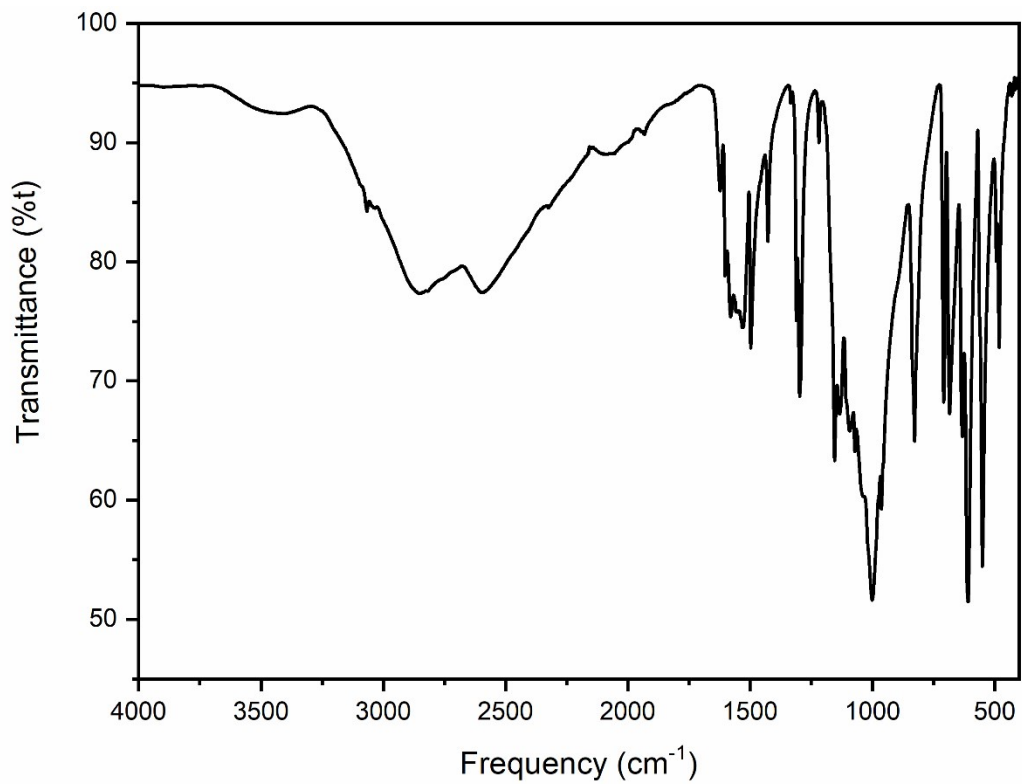

**Figure S3.** The Infrared spectrum recorded for 4,4'-DDS-S.

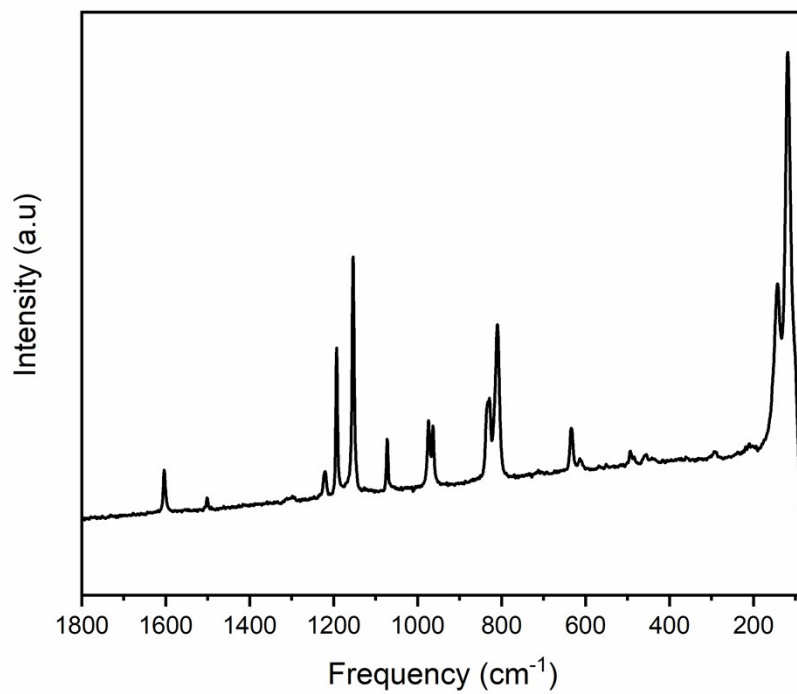

**Figure S4.** The Raman spectrum recorded for the 4,4'-DDS-S.



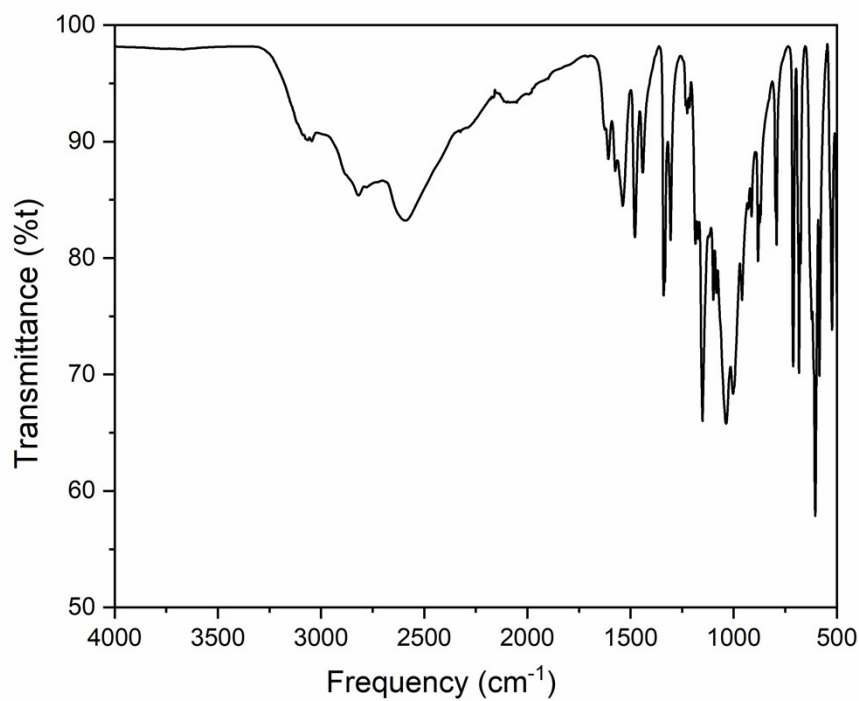

Figure S5. The Infrared spectrum recorded for 3,3'-DDS-S.

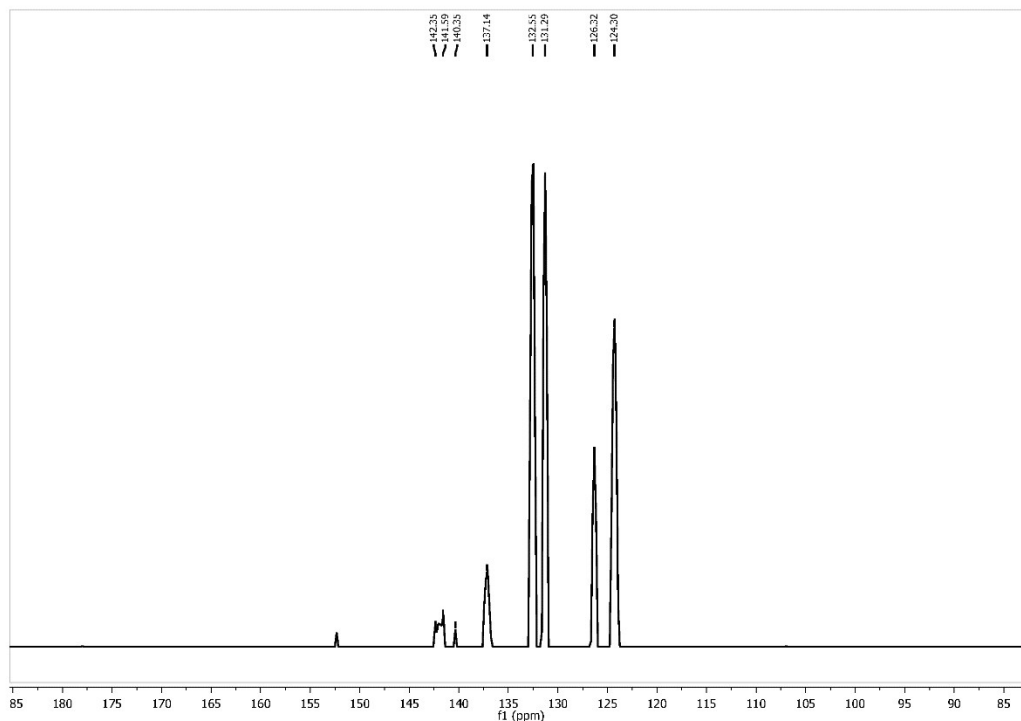

Figure S6. NMR <sup>13</sup>C MASS spectrum recorded for 4,4'-DDS-S.

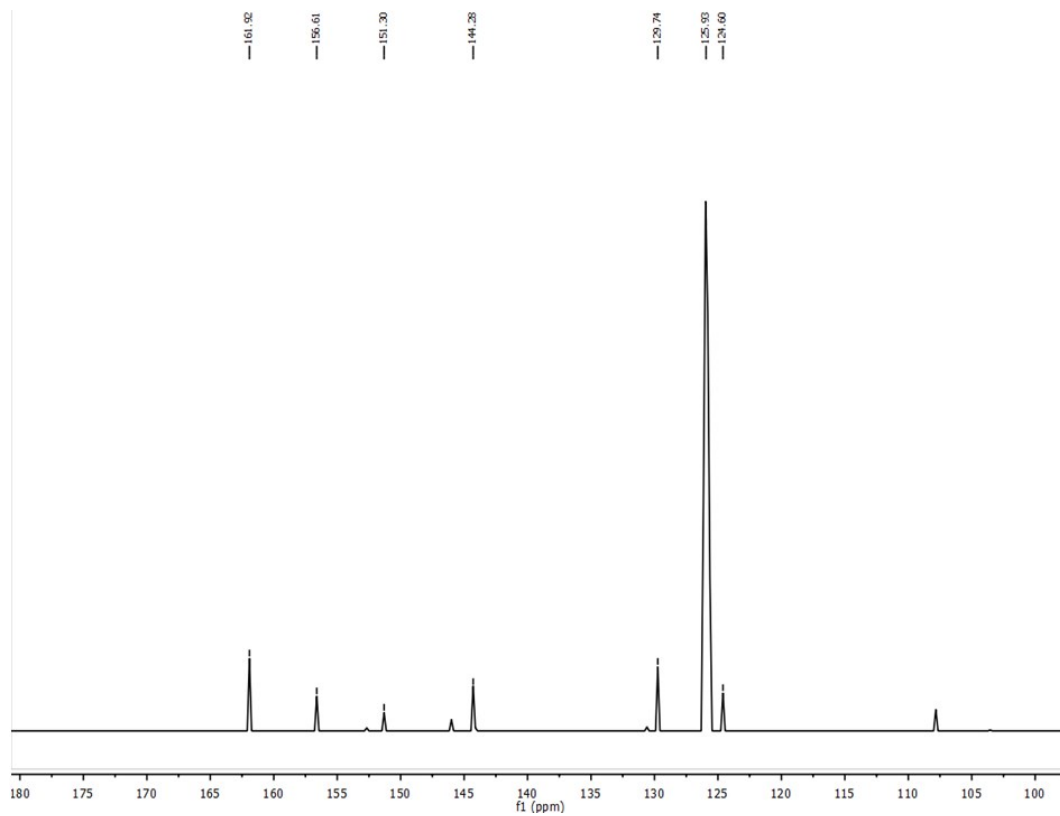

**Figure S7.** NMR  $^{13}\text{C}$  MASS spectrum recorded for **3,3'-DDS-S**.

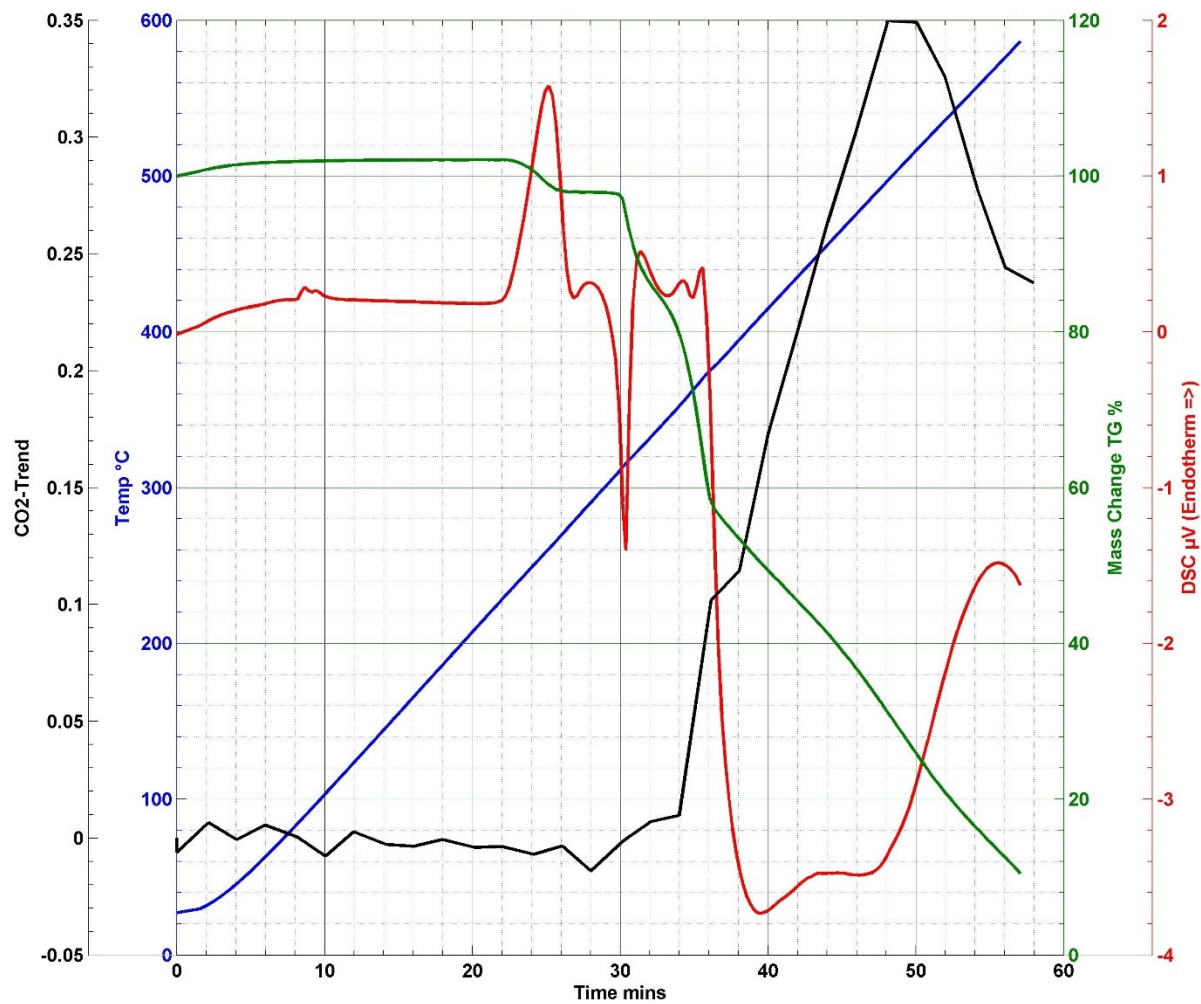

**Figure S8.** TGA-DSC of CO<sub>2</sub> gas releasing curves recorded for 4,4'-DDS-S.

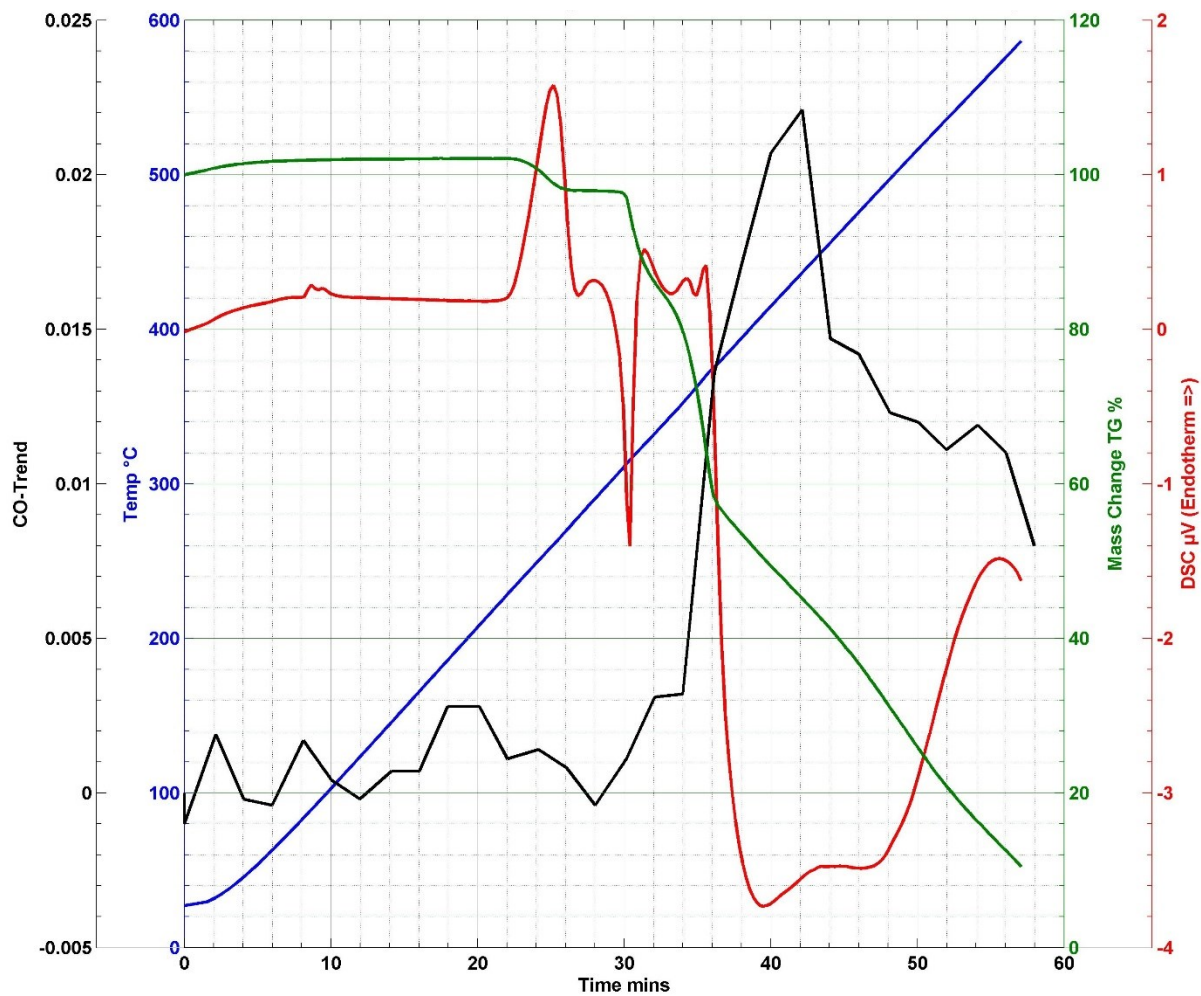

Figure S9. TGA-DSC of CO gas releasing curves recorded for 4,4'-DDS-S.

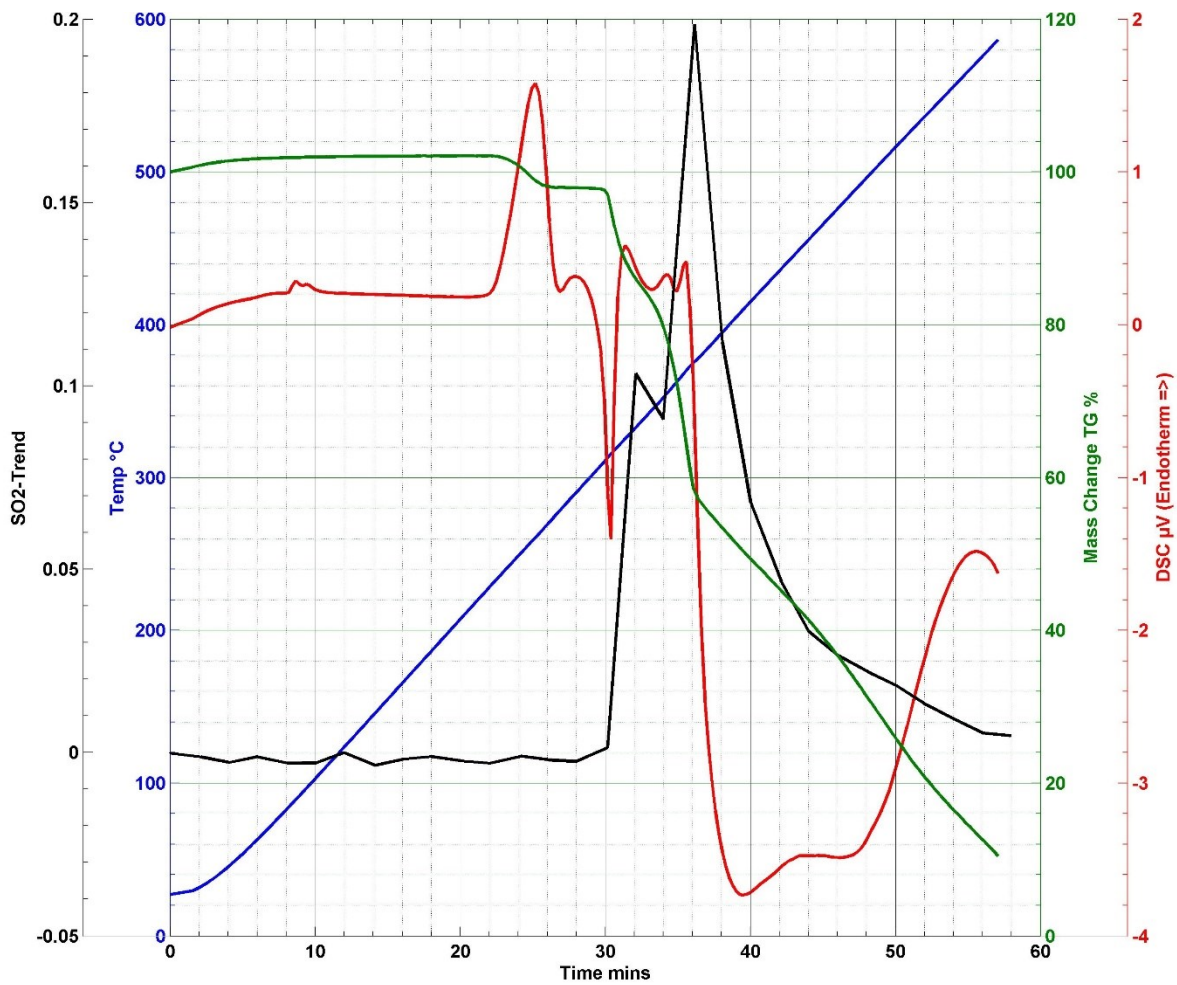

Figure S10. TGA-DSC of SO<sub>2</sub> gas releasing curves recorded for 4,4'-DDS-S.

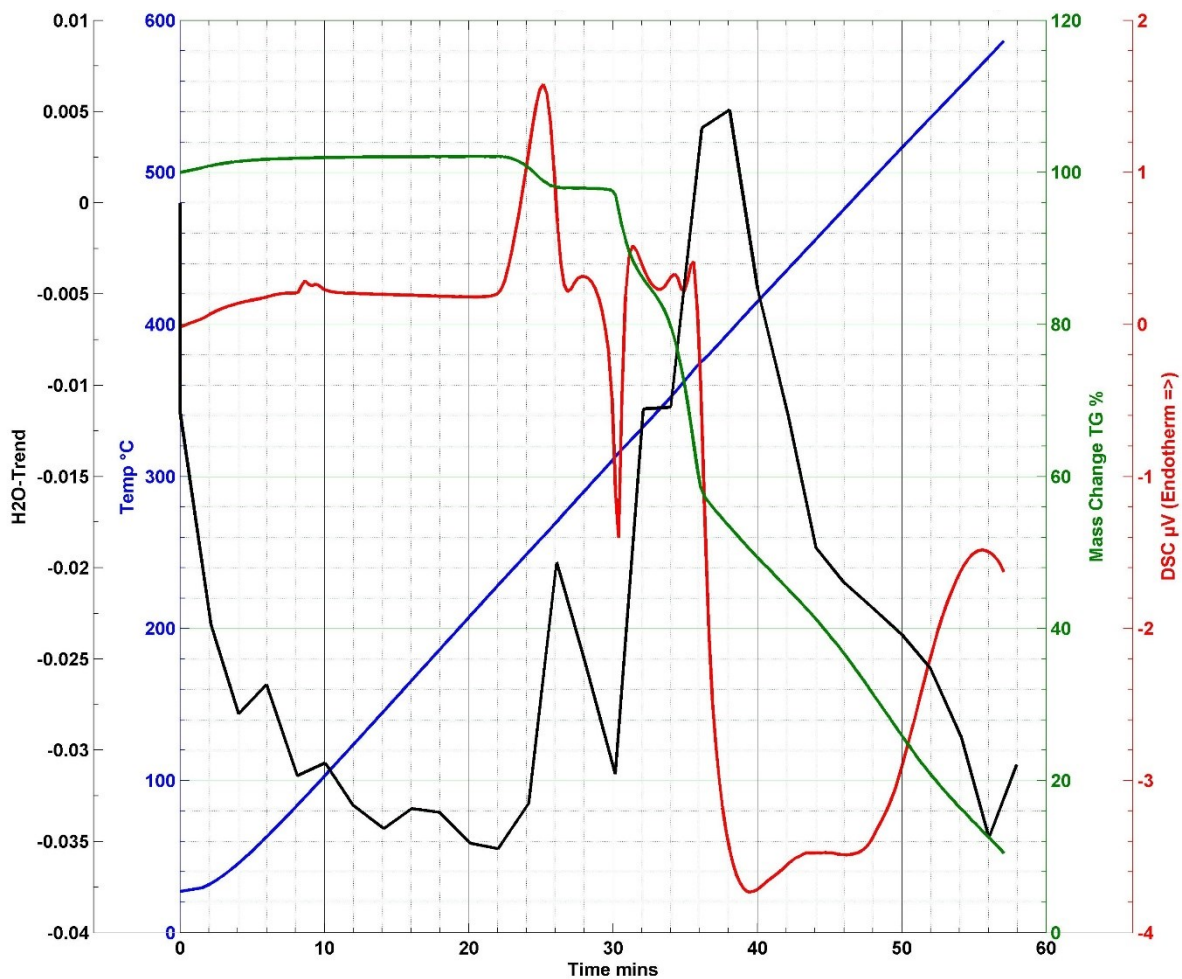

Figure S11. TGA-DSC of H<sub>2</sub>O gas releasing curves recorded for 4,4'-DDS-S.

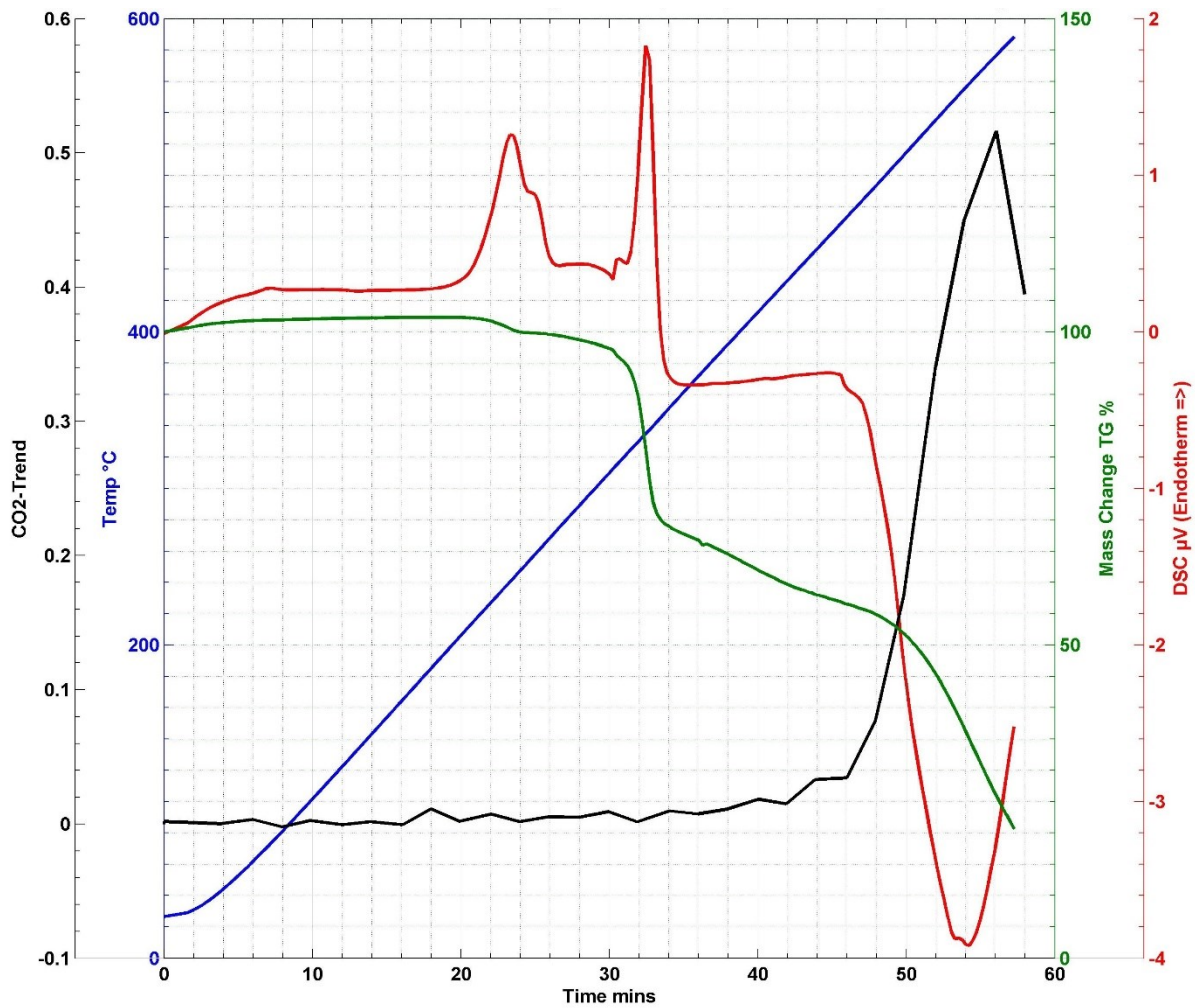

Figure S12. TGA-DSC of CO<sub>2</sub> gas releasing curves recorded for 3,3'-DDS-S.

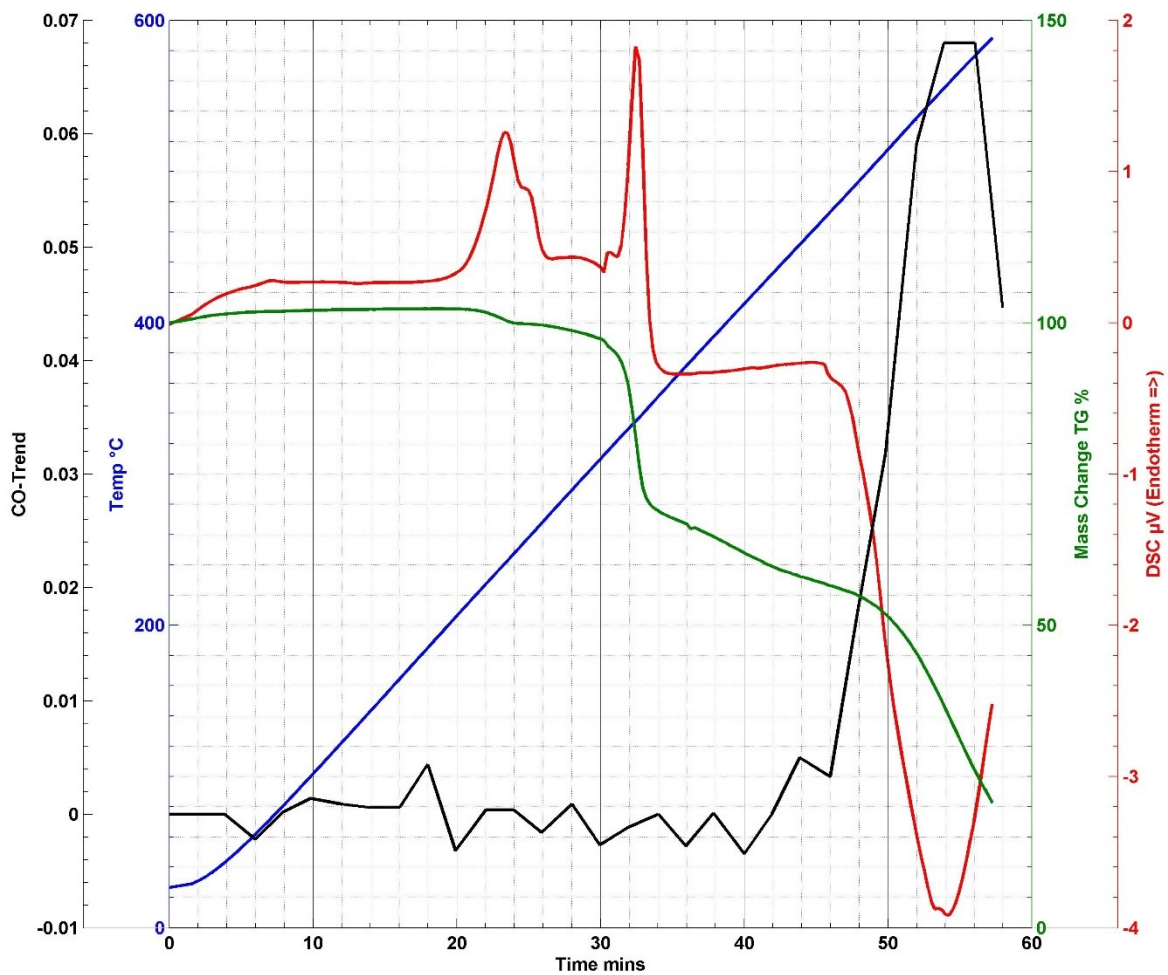

**Figure S13.** TGA-DSC of CO gas releasing curves recorded for 3,3'-DDS-S.



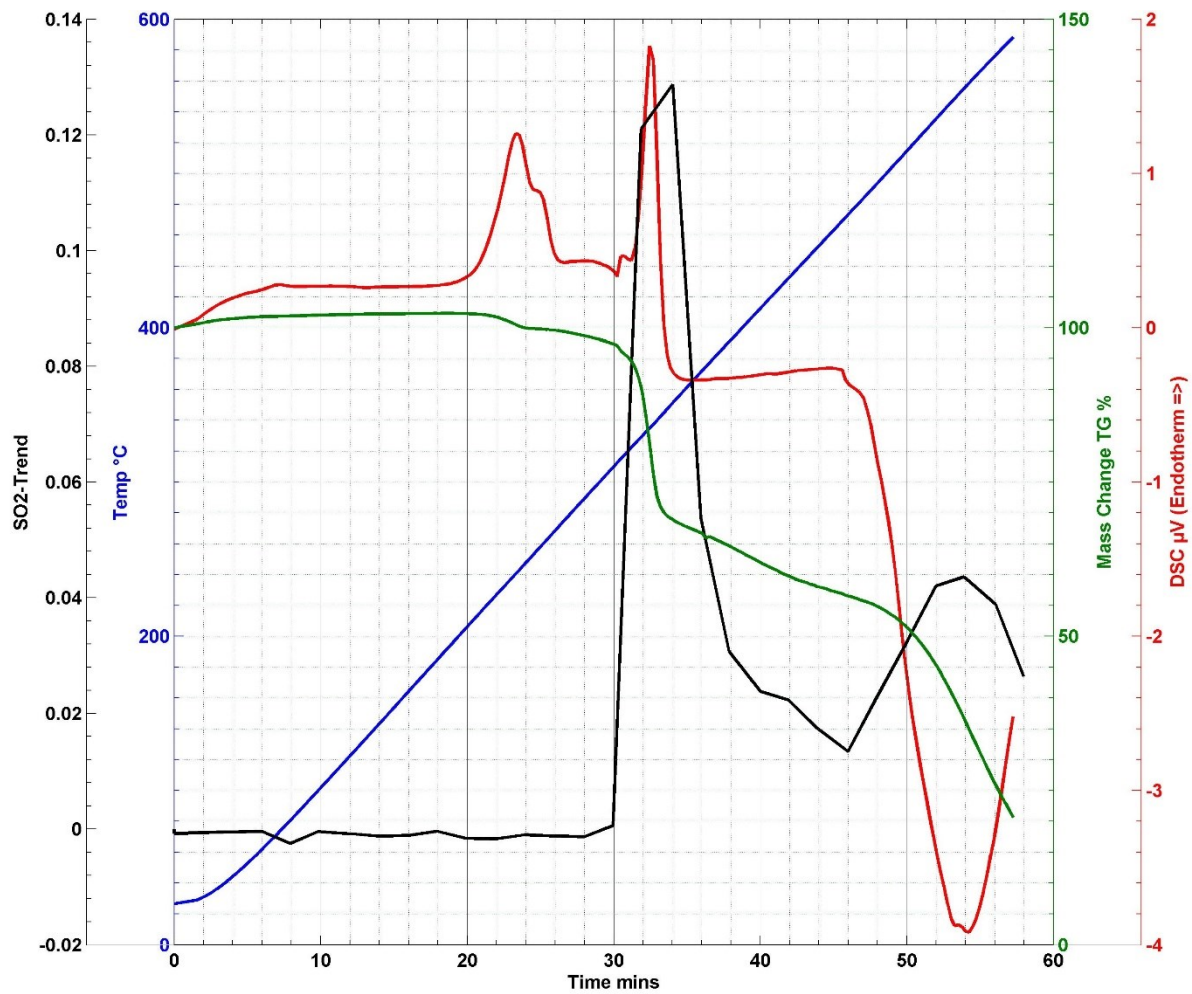

Figure S14. TGA-DSC of SO<sub>2</sub> gas releasing curves recorded for 3,3'-DDS-S.

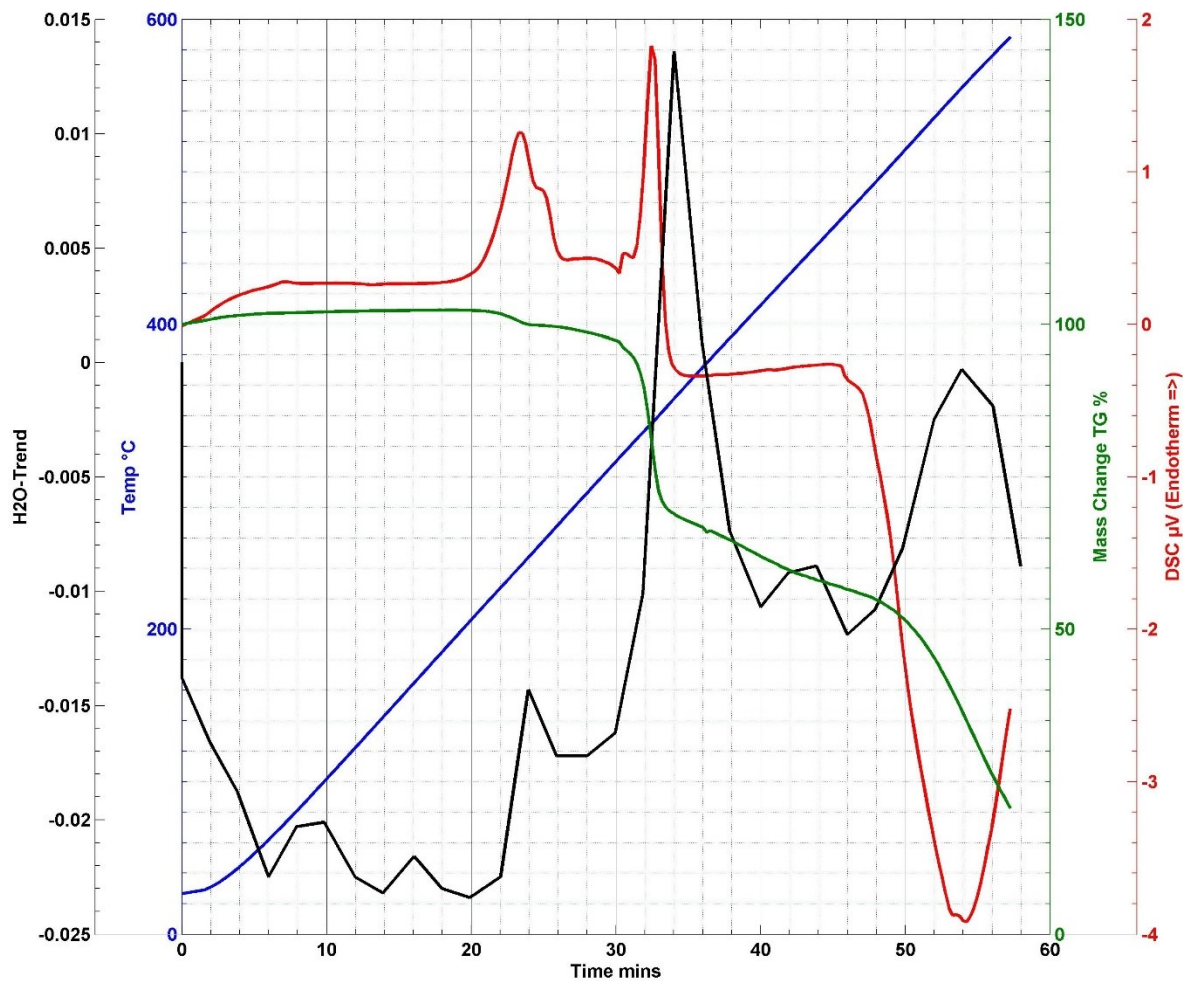

Figure S15. TGA-DSC of H<sub>2</sub>O gas releasing curves recorded for 3,3'-DDS-S.

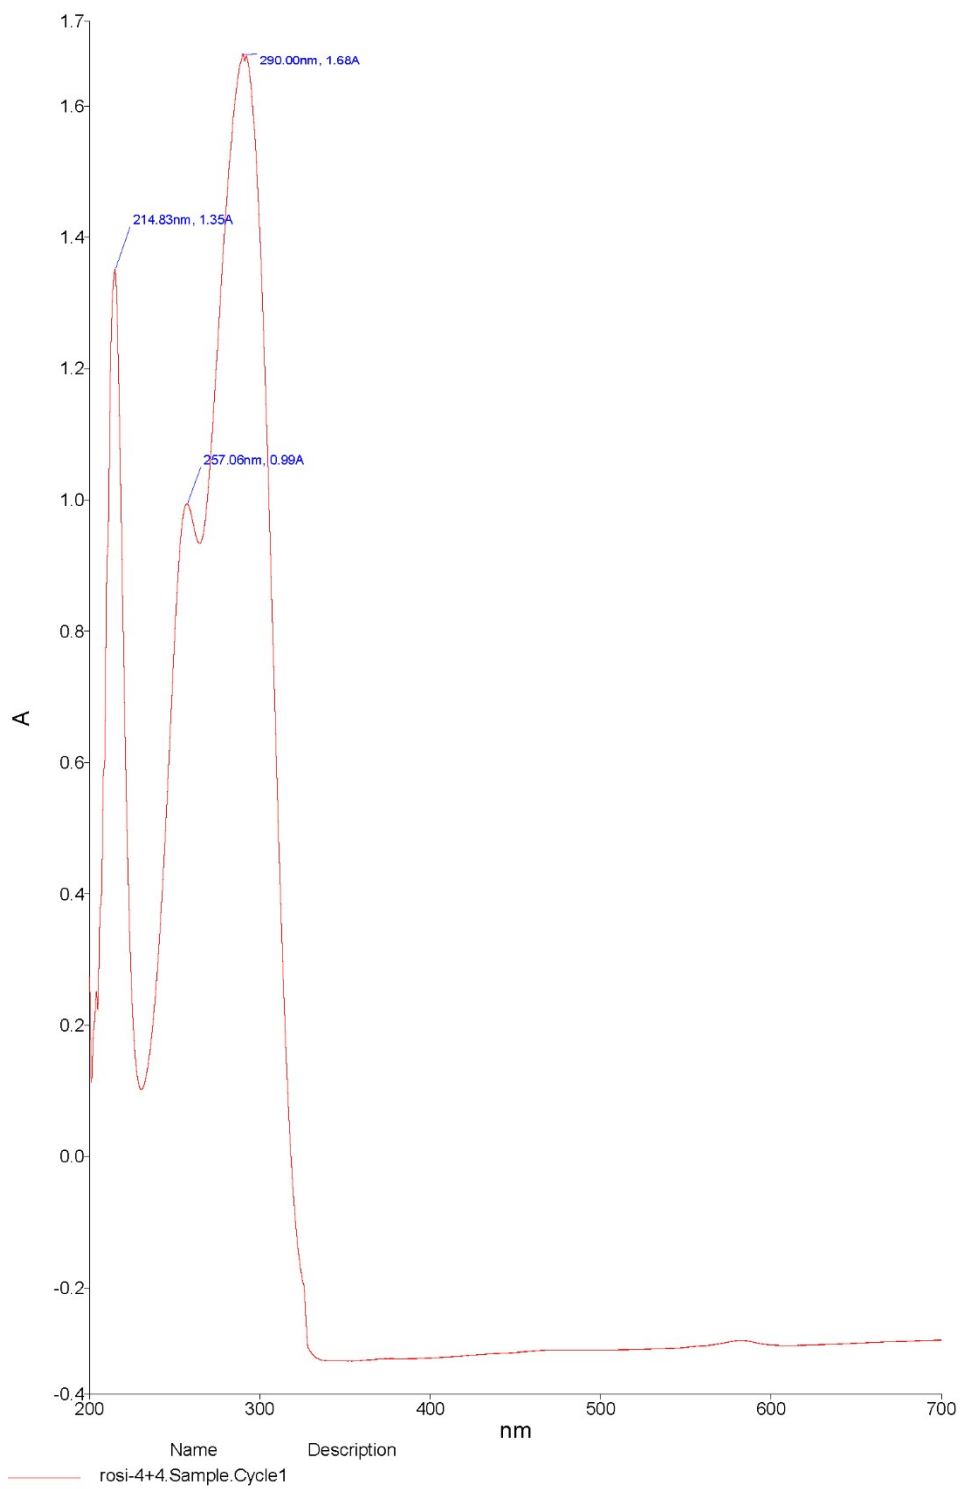

**Figure S16.** The UV-Vis spectrum recorded for 4,4'-DDS-S.

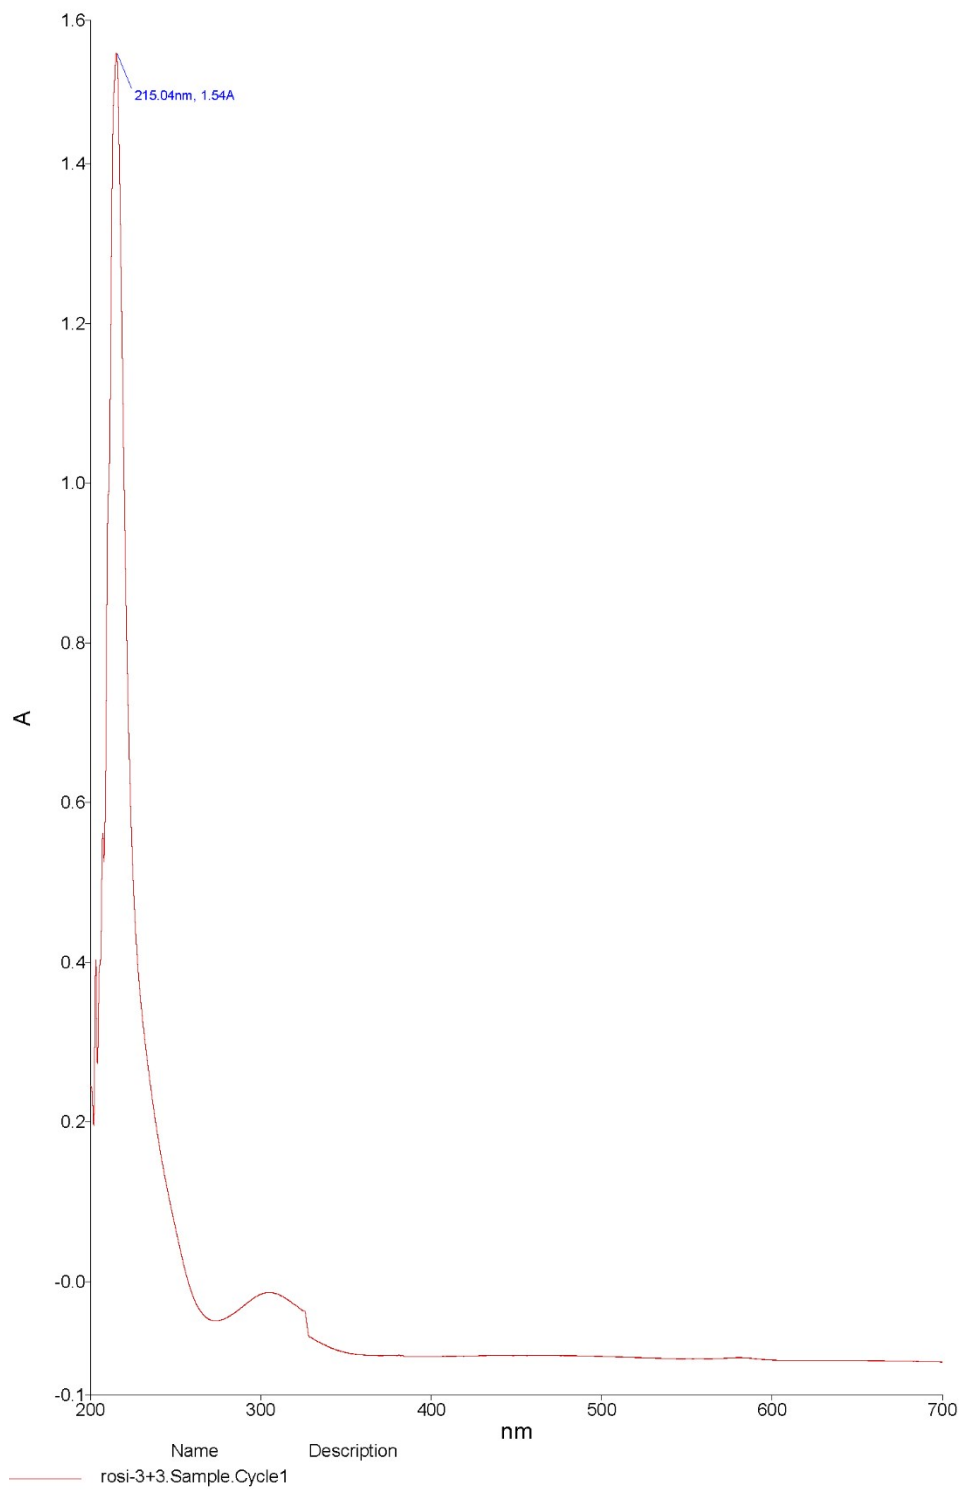

**Figure S17.** The UV-Vis spectrum recorded for 3,3'-DDS-S.
